# Supplementary material
Source: PubMed Central journal article supplement (PMC3404350)
Supplement: supp_en.2012-1044_en-12-1044_Supplemental_data.pdf [file supp_en.2012-1044_en-12-1044_Supplemental_data.pdf]

**Supplementary Material for Park, S. *et al.***  
**Uterine Development and Fertility are Dependent on Gene Dosage of the Nuclear Receptor  
Coregulator REA**

**3 Supplementary Figures and 1 Supplementary Table**

**Legends for Supplementary Figures**

**Figure S1. Genotyping PCR of REA<sup>ff</sup> and REA<sup>d/d</sup> mice.** Genomic DNA isolated from the indicated tissues was genotyped by PCR.

**Figure S2. Assessment of ovarian function in REA<sup>ff</sup> and REA<sup>d/d</sup> mice.** (A) Female mice at eight weeks of age were subjected to a superovulatory dose of the gonadotropins PMSG and hGC. Oocytes were then collected from their oviducts and counted. (B) Histological assessment of ovaries in REA<sup>ff</sup> and REA<sup>d/d</sup> mice at eight weeks of age.

**Figure S3. PR and REA expression and E2-regulated gene expression in the adult uterus of REA<sup>ff</sup> and REA<sup>d/d</sup> mice.** (A) Immunochemical detection of PR and REA in the uterus of eight-week-old REA<sup>ff</sup> and REA<sup>d/d</sup> mice. Scale bar represents 200  $\mu$ m. (B) mRNA levels of E2-regulated gene expressions were monitored by qRT-PCR in the uteri of REA<sup>ff</sup> and REA<sup>d/d</sup> mice. Six-week-old female mice were ovariectomized, and 2 weeks later, the mice were treated with vehicle or E2 for 3 days. The data are mean  $\pm$  SD, and mRNA levels are presented as relative expression normalized to 36B4 by wild type. \*\*, P < 0.01.

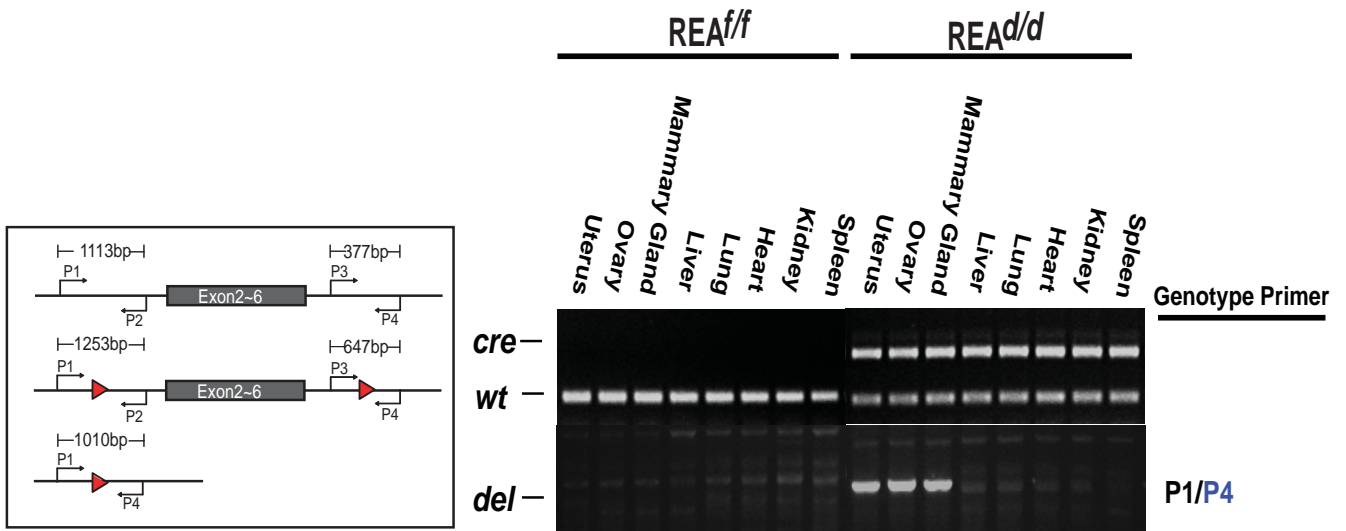

Figure S1

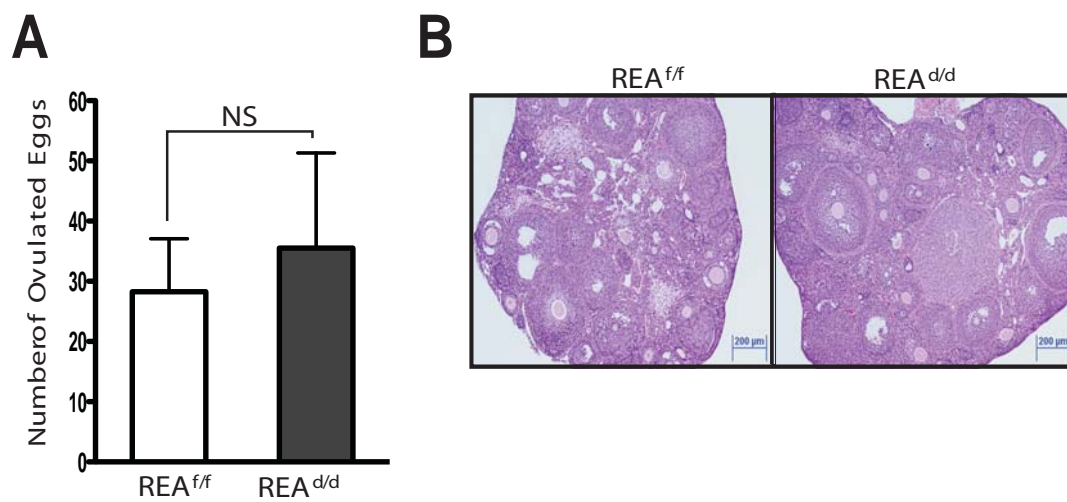

**Figure S2**

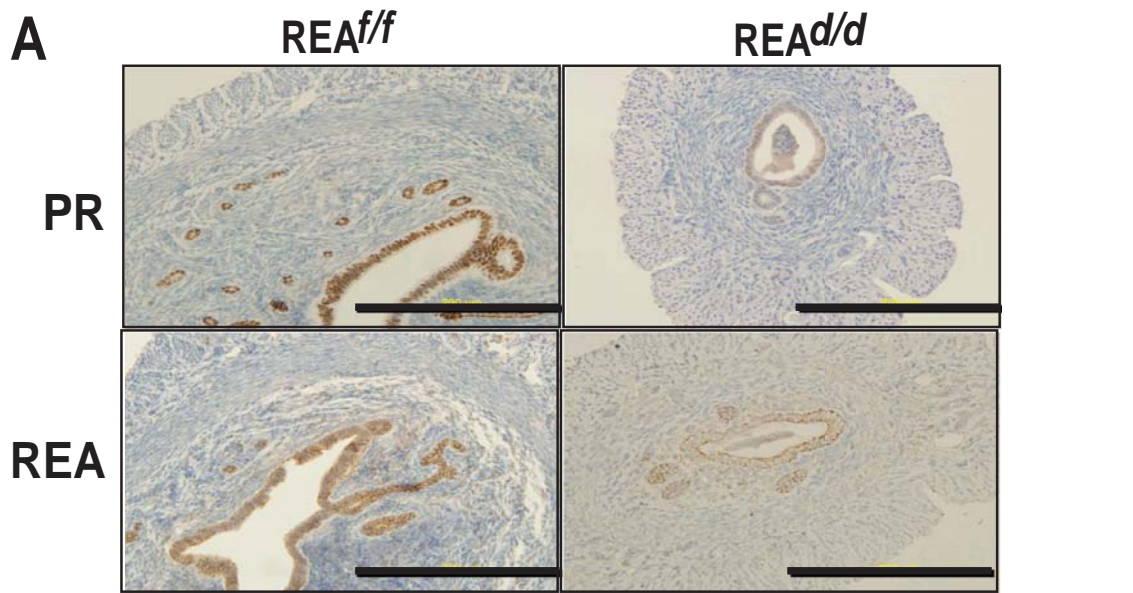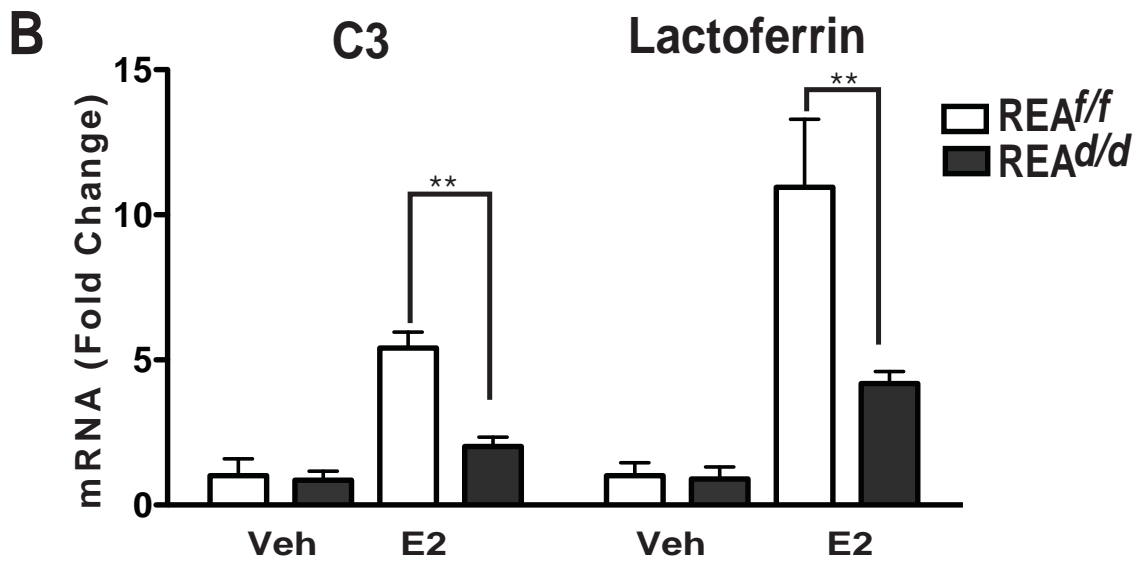

**Figure S3**

## Supplementary Table S1

### List of Primers for the Genes Studied

#### forward (f) Primer

REAf AGTGCTGCCGTCCATTGTAA  
PRPf CCAGCTCATGGACCTGAACAT  
BMP2f AAAGCGTCAAGCCAAACACA  
Hoxa10f CACAGGCCACTTCGTGTTCTT  
Hoxa11f ATTTTGATGAGCGTGGTCCCT  
Wnt4f TGCCAATACCAGTTCCGGA  
VDRf CATCTGCATTGTCTCCCCAGA  
36B4f CGACCTGGAAGTCCAACACTAC  
EGFRf TGGATGAAGAGGACATGGAGG  
HGFf GCAAGACAATGTTTTCCAGCC  
p21f TTCCGCACAGGAGCAAAGT

#### reverse (r) Primer

REAr TCTTCGGATCAACAGGGACAC  
PRPr GGAGTGATCCATGCACCCATA  
BMP2r ACCCCACATCACTGAAGTCCA  
Hoxa10r TTTGTCCGCAGCATCGTAGAG  
Hoxa11r AGAAATCTGGACCCGAGACGT  
Wnt4r TCACCACCTTCCCAAAGACAG  
VDRr TTGGATAGGCGGTCCTGAAT  
36B4r ATCTGCTGCATCTGCTTG  
EGFRr TGGACGGGCTGTTGAAGAA  
HGFr CATGAACATCGTGGATGCCA  
p21r ATGAGCGCATCGCAATCAC
